# Supplementary material
Source: publisher figshare collection journal article supplement (https://acs.figshare.com/ndownloader/files/4615528)
Supplement: Supplementary file 1 [file 4615528]

 
data_MOP-15 
 
_journal_name_full                ?
 
loop_ 
_publ_author_name 
'Hiroyasu Furukawa'
'Jaheon Kim'
'Nathan W. Ockwig'
'Michael O'Keeffe'
'Omar M. Yaghi' 
  
_publ_contact_author_name 'Professor Omar M. Yaghi' 
_publ_contact_author_address 
; 
Department of Chemistry and Biochemistry
University of Caligornia-Los Angeles 
Los Angeles, CA 90095 
USA 
; 

_publ_contact_author_email yaghi@chem.ucla.edu 

_audit_creation_method            SHELXL-97 
_chemical_name_systematic 
; 
 ? 
; 
_chemical_name_common             'MOP-15' 
_chemical_melting_point           ? 
_chemical_formula_moiety          'C358 H578 Cu24 N74 O185' 
_chemical_formula_sum 
 'C358 H578 Cu24 N74 O185' 
_chemical_formula_weight          10403.90 
 
loop_ 
 _atom_type_symbol 
 _atom_type_description 
 _atom_type_scat_dispersion_real 
 _atom_type_scat_dispersion_imag 
 _atom_type_scat_source 
 'C'  'C'   0.0033   0.0016 
 'International Tables Vol C Tables 4.2.6.8 and 6.1.1.4' 
 'H'  'H'   0.0000   0.0000 
 'International Tables Vol C Tables 4.2.6.8 and 6.1.1.4' 
 'N'  'N'   0.0061   0.0033 
 'International Tables Vol C Tables 4.2.6.8 and 6.1.1.4' 
 'O'  'O'   0.0106   0.0060 
 'International Tables Vol C Tables 4.2.6.8 and 6.1.1.4' 
 'Cu'  'Cu'   0.3201   1.2651 
 'International Tables Vol C Tables 4.2.6.8 and 6.1.1.4' 
 
_symmetry_cell_setting            tetragonal 
_symmetry_space_group_name_H-M    I4/m 
 
loop_ 
 _symmetry_equiv_pos_as_xyz 
 'x, y, z' 
 '-x, -y, z' 
 '-y, x, z' 
 'y, -x, z' 
 'x+1/2, y+1/2, z+1/2' 
 '-x+1/2, -y+1/2, z+1/2' 
 '-y+1/2, x+1/2, z+1/2' 
 'y+1/2, -x+1/2, z+1/2' 
 '-x, -y, -z' 
 'x, y, -z' 
 'y, -x, -z' 
 '-y, x, -z' 
 '-x+1/2, -y+1/2, -z+1/2' 
 'x+1/2, y+1/2, -z+1/2' 
 'y+1/2, -x+1/2, -z+1/2' 
 '-y+1/2, x+1/2, -z+1/2' 
 
_cell_length_a                    31.2356(14) 
_cell_length_b                    31.2356(14) 
_cell_length_c                    30.617(3) 
_cell_angle_alpha                 90.00 
_cell_angle_beta                  90.00 
_cell_angle_gamma                 90.00 
_cell_volume                      29872(4) 
_cell_formula_units_Z             2 
_cell_measurement_temperature     153(2) 
_cell_measurement_reflns_used     1878 
_cell_measurement_theta_min       2.27 
_cell_measurement_theta_max       22.60 
 
_exptl_crystal_description        'truncated octahedron' 
_exptl_crystal_colour             green 
_exptl_crystal_size_max           0.21 
_exptl_crystal_size_mid           0.19 
_exptl_crystal_size_min           0.11 
_exptl_crystal_density_meas       ? 
_exptl_crystal_density_diffrn     1.157 
_exptl_crystal_density_method     'not measured' 
_exptl_crystal_F_000              10840 
_exptl_absorpt_coefficient_mu     0.912 
_exptl_absorpt_correction_type    empirical 
_exptl_absorpt_correction_T_min   ? 
_exptl_absorpt_correction_T_max   ? 
_exptl_absorpt_process_details    'SADABS; Sheldrick, 1996'
; ratio of minimum to maximum apparent transmission:  0.865803 
;  
 
_exptl_special_details 
; 
 ? 
; 
 
_diffrn_ambient_temperature       153(2) 
_diffrn_radiation_wavelength      0.71073 
_diffrn_radiation_type            MoK\a 
_diffrn_radiation_source          'fine-focus sealed tube' 
_diffrn_radiation_monochromator   graphite 
_diffrn_measurement_device_type   'Bruker SMART APEX' 
_diffrn_measurement_method        'phi and omega scans' 
_diffrn_detector_area_resol_mean  ? 
_diffrn_standards_number          ? 
_diffrn_standards_interval_count  ? 
_diffrn_standards_interval_time   ? 
_diffrn_standards_decay_%         none 
_diffrn_reflns_number             75873 
_diffrn_reflns_av_R_equivalents   0.0650 
_diffrn_reflns_av_sigmaI/netI     0.0493 
_diffrn_reflns_limit_h_min        -34 
_diffrn_reflns_limit_h_max        21 
_diffrn_reflns_limit_k_min        -34 
_diffrn_reflns_limit_k_max        32 
_diffrn_reflns_limit_l_min        -34 
_diffrn_reflns_limit_l_max        31 
_diffrn_reflns_theta_min          0.92 
_diffrn_reflns_theta_max          23.31 
_reflns_number_total              11031 
_reflns_number_gt                 7888 
_reflns_threshold_expression      >2sigma(I) 
 
_computing_data_collection        'Bruker SMART' 
_computing_cell_refinement        'Bruker SAINT' 
_computing_data_reduction         'Bruker SAINT' 
_computing_structure_solution     'SHELXS-97 (Sheldrick, 1990)' 
_computing_structure_refinement   'SHELXL-97 (Sheldrick, 1997)' 
_computing_molecular_graphics     'Bruker SHELXTL' 
_computing_publication_material   'Bruker SHELXTL' 
 
_refine_special_details 
; 
 Refinement of F^2^ against ALL reflections.  The weighted R-factor wR and 
 goodness of fit S are based on F^2^, conventional R-factors R are based 
 on F, with F set to zero for negative F^2^. The threshold expression of 
 F^2^ > 2sigma(F^2^) is used only for calculating R-factors(gt) etc. and is 
 not relevant to the choice of reflections for refinement.  R-factors based 
 on F^2^ are statistically about twice as large as those based on F, and R- 
 factors based on ALL data will be even larger. 
; 
 
_refine_ls_structure_factor_coef  Fsqd  
_refine_ls_matrix_type            full 
_refine_ls_weighting_scheme       calc  
_refine_ls_weighting_details 
 'calc w=1/[\s^2^(Fo^2^)+(0.1341P)^2^+0.0000P] where P=(Fo^2^+2Fc^2^)/3' 
_atom_sites_solution_primary      direct 
_atom_sites_solution_secondary    difmap 
_atom_sites_solution_hydrogens    geom 
_refine_ls_hydrogen_treatment     ? 
_refine_ls_extinction_method      none 
_refine_ls_extinction_coef        ? 
_refine_ls_number_reflns          11031 
_refine_ls_number_parameters      698 
_refine_ls_number_restraints      15 
_refine_ls_R_factor_all           0.0863 
_refine_ls_R_factor_gt            0.0650 
_refine_ls_wR_factor_ref          0.1932 
_refine_ls_wR_factor_gt           0.1829 
_refine_ls_goodness_of_fit_ref    1.008 
_refine_ls_restrained_S_all       1.009 
_refine_ls_shift/su_max           0.002 
_refine_ls_shift/su_mean          0.000 
 
loop_ 
 _atom_site_label 
 _atom_site_type_symbol 
 _atom_site_fract_x 
 _atom_site_fract_y 
 _atom_site_fract_z 
 _atom_site_U_iso_or_equiv 
 _atom_site_adp_type 
 _atom_site_occupancy 
 _atom_site_symmetry_multiplicity 
 _atom_site_calc_flag 
 _atom_site_refinement_flags 
 _atom_site_disorder_assembly 
 _atom_site_disorder_group 
Cu1 Cu -0.053955(18) 0.765242(19) 0.74305(2) 0.0352(2) Uani 1 1 d . . . 
Cu2 Cu -0.040908(18) 0.822524(19) 0.68187(2) 0.0362(2) Uani 1 1 d . . . 
Cu3 Cu -0.29148(3) 0.81907(3) 0.5000 0.0345(2) Uani 1 2 d S . . 
Cu4 Cu -0.21961(3) 0.86286(3) 0.5000 0.0358(2) Uani 1 2 d S . . 
O1 O -0.10578(11) 0.75041(11) 0.70985(11) 0.0443(9) Uani 1 1 d . . . 
O2 O -0.09186(11) 0.79610(12) 0.65521(12) 0.0484(9) Uani 1 1 d . . . 
O3 O -0.26233(11) 0.78504(11) 0.54553(11) 0.0425(9) Uani 1 1 d . . . 
O4 O -0.20113(11) 0.82285(11) 0.54526(11) 0.0467(9) Uani 1 1 d . . . 
O5 O -0.08552(11) 0.81279(11) 0.77062(11) 0.0450(9) Uani 1 1 d . . . 
O6 O -0.07922(11) 0.85935(11) 0.71583(12) 0.0491(9) Uani 1 1 d . . . 
O7 O -0.21253(11) 1.00073(11) 0.76937(12) 0.0451(9) Uani 1 1 d . . . 
O8 O -0.16106(11) 0.99276(11) 0.71926(13) 0.0493(9) Uani 1 1 d . . . 
O9 O -0.02000(11) 0.72767(11) 0.70518(12) 0.0477(9) Uani 1 1 d . . . 
O10 O -0.00470(12) 0.77814(12) 0.65649(13) 0.0505(10) Uani 1 1 d . . . 
O11 O 0.13953(11) 0.69003(11) 0.54483(11) 0.0439(9) Uani 1 1 d . . . 
O12 O 0.10351(11) 0.75163(12) 0.54515(12) 0.0508(10) Uani 1 1 d . . . 
N1 N -0.23709(18) 0.67083(17) 0.65983(19) 0.0789(18) Uani 1 1 d . . . 
H1A H -0.2273 0.6557 0.6819 0.095 Uiso 1 1 calc R . . 
H1B H -0.2609 0.6632 0.6467 0.095 Uiso 1 1 calc R . . 
N2 N -0.18402(15) 0.88173(16) 0.87838(15) 0.0599(13) Uani 1 1 d . . . 
H2A H -0.2029 0.8981 0.8916 0.072 Uiso 1 1 calc R . . 
H2B H -0.1751 0.8580 0.8910 0.072 Uiso 1 1 calc R . . 
N3 N 0.0566(2) 0.59561(16) 0.6507(2) 0.101(2) Uani 1 1 d . . . 
H3A H 0.0404 0.5866 0.6723 0.121 Uiso 1 1 calc R . . 
H3B H 0.0736 0.5775 0.6370 0.121 Uiso 1 1 calc R . . 
C1 C -0.15454(16) 0.75464(17) 0.65118(17) 0.0422(13) Uani 1 1 d . . . 
C2 C -0.16927(15) 0.77795(16) 0.61581(17) 0.0395(12) Uani 1 1 d . . . 
H2C H -0.1533 0.8016 0.6051 0.047 Uiso 1 1 calc R . . 
C3 C -0.20745(16) 0.76645(16) 0.59613(16) 0.0388(12) Uani 1 1 d . . . 
C4 C -0.23022(16) 0.73072(16) 0.61042(18) 0.0440(13) Uani 1 1 d . . . 
H4A H -0.2560 0.7227 0.5961 0.053 Uiso 1 1 calc R . . 
C5 C -0.21509(17) 0.70662(18) 0.64589(18) 0.0485(14) Uani 1 1 d . . . 
C6 C -0.17745(17) 0.71933(17) 0.66609(18) 0.0475(14) Uani 1 1 d . . . 
H6A H -0.1671 0.7037 0.6905 0.057 Uiso 1 1 calc R . . 
C7 C -0.11443(16) 0.76790(17) 0.67389(18) 0.0425(13) Uani 1 1 d . . . 
C8 C -0.22494(17) 0.79369(17) 0.55946(17) 0.0419(13) Uani 1 1 d . . . 
C9 C -0.12342(16) 0.87781(15) 0.77555(17) 0.0370(12) Uani 1 1 d . . . 
C10 C -0.13598(16) 0.91557(16) 0.75545(17) 0.0419(13) Uani 1 1 d . . . 
H10A H -0.1245 0.9233 0.7278 0.050 Uiso 1 1 calc R . . 
C11 C -0.16541(15) 0.94201(16) 0.77599(17) 0.0398(12) Uani 1 1 d . . . 
C12 C -0.18167(17) 0.93057(16) 0.81681(18) 0.0446(13) Uani 1 1 d . . . 
H12A H -0.2022 0.9484 0.8307 0.054 Uiso 1 1 calc R . . 
C13 C -0.16812(16) 0.89333(17) 0.83735(17) 0.0439(13) Uani 1 1 d . . . 
C14 C -0.13926(15) 0.86675(17) 0.81589(17) 0.0414(13) Uani 1 1 d . . . 
H14A H -0.1304 0.8407 0.8292 0.050 Uiso 1 1 calc R . . 
C15 C -0.09366(15) 0.84759(16) 0.75197(17) 0.0388(12) Uani 1 1 d . . . 
C16 C -0.18098(16) 0.98132(15) 0.75340(18) 0.0395(12) Uani 1 1 d . . . 
C17 C 0.02678(16) 0.71053(17) 0.64716(18) 0.0448(13) Uani 1 1 d . . . 
C18 C 0.05317(16) 0.72525(17) 0.61411(18) 0.0450(13) Uani 1 1 d . . . 
H18A H 0.0525 0.7546 0.6059 0.054 Uiso 1 1 calc R . . 
C19 C 0.08072(15) 0.69714(16) 0.59294(17) 0.0395(12) Uani 1 1 d . . . 
C20 C 0.08151(18) 0.65473(19) 0.6040(2) 0.0574(16) Uani 1 1 d . . . 
H20A H 0.0999 0.6358 0.5886 0.069 Uiso 1 1 calc R . . 
C21 C 0.0555(2) 0.63865(19) 0.6380(2) 0.0674(19) Uani 1 1 d . . . 
C22 C 0.02847(19) 0.66797(18) 0.6596(2) 0.0609(17) Uani 1 1 d . . . 
H22A H 0.0111 0.6583 0.6832 0.073 Uiso 1 1 calc R . . 
C23 C -0.00121(16) 0.74135(18) 0.67108(18) 0.0430(13) Uani 1 1 d . . . 
C24 C 0.11029(17) 0.71413(18) 0.55868(17) 0.0429(13) Uani 1 1 d . . . 
O1S O -0.06519(12) 0.72216(12) 0.79625(13) 0.0536(10) Uani 1 1 d . . . 
N1S N -0.0605(2) 0.7164(3) 0.8708(2) 0.115(3) Uani 1 1 d . . . 
C1S C -0.0587(3) 0.7383(3) 0.8339(3) 0.109(3) Uani 1 1 d . . . 
H1SA H -0.0522 0.7679 0.8355 0.131 Uiso 1 1 calc R . . 
C2S C -0.0722(3) 0.6690(3) 0.8692(4) 0.140(4) Uani 1 1 d . . . 
H2SA H -0.0774 0.6605 0.8388 0.210 Uiso 1 1 calc R . . 
H2SB H -0.0982 0.6641 0.8864 0.210 Uiso 1 1 calc R . . 
H2SC H -0.0487 0.6520 0.8812 0.210 Uiso 1 1 calc R . . 
C3S C -0.0509(6) 0.7369(6) 0.9129(4) 0.278(11) Uani 1 1 d . . . 
H3SA H -0.0437 0.7671 0.9081 0.417 Uiso 1 1 calc R . . 
H3SB H -0.0267 0.7223 0.9267 0.417 Uiso 1 1 calc R . . 
H3SC H -0.0761 0.7349 0.9319 0.417 Uiso 1 1 calc R . . 
O2S O -0.3480(2) 0.7788(3) 0.5000 0.094(3) Uani 1 2 d S . . 
N2S N -0.3592(5) 0.6997(4) 0.5000 0.128(4) Uani 1 2 d S . . 
C4S C -0.3301(5) 0.7304(5) 0.5000 0.128(5) Uani 1 2 d S . . 
H4SA H -0.3003 0.7243 0.5000 0.154 Uiso 1 2 calc SR . . 
C5S C -0.4060(7) 0.7075(12) 0.5000 0.38(3) Uani 1 2 d S . . 
H5SA H -0.4114 0.7384 0.5000 0.571 Uiso 1 2 calc SR . . 
H5SB H -0.4187 0.6947 0.5261 0.571 Uiso 0.50 1 calc PR . . 
H5SC H -0.4187 0.6947 0.4739 0.571 Uiso 0.50 1 calc PR . . 
C6S C -0.3404(6) 0.6582(4) 0.5000 0.152(7) Uani 1 2 d S . . 
H6SA H -0.3091 0.6609 0.5000 0.228 Uiso 1 2 calc SR . . 
H6SB H -0.3495 0.6426 0.4739 0.228 Uiso 0.50 1 calc PR . . 
H6SC H -0.3495 0.6426 0.5261 0.228 Uiso 0.50 1 calc PR . . 
O3S O 0.21174(17) 0.84897(19) 0.11195(18) 0.0975(17) Uani 1 1 d D . . 
N3S N 0.27184(16) 0.82867(16) 0.15025(18) 0.0601(13) Uani 1 1 d D . . 
C7S C 0.2506(2) 0.8400(2) 0.1140(2) 0.0715(19) Uani 1 1 d D . . 
H7SA H 0.2666 0.8414 0.0877 0.086 Uiso 1 1 calc R . . 
C8S C 0.2501(2) 0.8250(2) 0.1918(2) 0.077(2) Uani 1 1 d D . . 
H8SA H 0.2204 0.8348 0.1887 0.116 Uiso 1 1 calc R . . 
H8SB H 0.2648 0.8426 0.2136 0.116 Uiso 1 1 calc R . . 
H8SC H 0.2503 0.7950 0.2013 0.116 Uiso 1 1 calc R . . 
C9S C 0.3155(2) 0.8149(3) 0.1470(3) 0.087(2) Uani 1 1 d D . . 
H9SA H 0.3254 0.8185 0.1169 0.130 Uiso 1 1 calc R . . 
H9SB H 0.3176 0.7847 0.1554 0.130 Uiso 1 1 calc R . . 
H9SC H 0.3333 0.8322 0.1666 0.130 Uiso 1 1 calc R . . 
O4S O 0.12598(17) 0.71806(16) 0.24159(17) 0.0875(16) Uani 1 1 d . . . 
N4S N 0.13876(16) 0.77183(17) 0.28961(17) 0.0602(14) Uani 1 1 d . . . 
C10S C 0.1144(2) 0.7426(2) 0.2712(2) 0.0671(18) Uani 1 1 d . . . 
H10B H 0.0857 0.7400 0.2813 0.081 Uiso 1 1 calc R . . 
C11S C 0.1820(2) 0.7802(2) 0.2753(2) 0.076(2) Uani 1 1 d . . . 
H11A H 0.1893 0.7608 0.2513 0.115 Uiso 1 1 calc R . . 
H11B H 0.2018 0.7757 0.2997 0.115 Uiso 1 1 calc R . . 
H11C H 0.1842 0.8099 0.2652 0.115 Uiso 1 1 calc R . . 
C12S C 0.1226(2) 0.7981(2) 0.3257(2) 0.0664(18) Uani 1 1 d . . . 
H12B H 0.0933 0.7893 0.3327 0.100 Uiso 1 1 calc R . . 
H12C H 0.1228 0.8283 0.3170 0.100 Uiso 1 1 calc R . . 
H12D H 0.1409 0.7941 0.3513 0.100 Uiso 1 1 calc R . . 
O5S O 0.4249(2) 0.9752(2) 0.3001(3) 0.151(3) Uani 1 1 d . . . 
N5S N 0.3815(3) 0.9166(3) 0.2849(4) 0.126(3) Uani 1 1 d . . . 
C13S C 0.4126(3) 0.9482(3) 0.2765(4) 0.128(4) Uani 1 1 d . . . 
H13A H 0.4251 0.9476 0.2483 0.154 Uiso 1 1 calc R . . 
C14S C 0.3632(3) 0.9116(4) 0.3297(4) 0.142(4) Uani 1 1 d . . . 
H14B H 0.3769 0.9321 0.3496 0.213 Uiso 1 1 calc R . . 
H14C H 0.3684 0.8824 0.3402 0.213 Uiso 1 1 calc R . . 
H14D H 0.3323 0.9170 0.3289 0.213 Uiso 1 1 calc R . . 
C15S C 0.3689(4) 0.8891(3) 0.2461(4) 0.170(6) Uani 1 1 d . . . 
H15A H 0.3866 0.8967 0.2208 0.255 Uiso 1 1 calc R . . 
H15B H 0.3387 0.8939 0.2391 0.255 Uiso 1 1 calc R . . 
H15C H 0.3734 0.8588 0.2533 0.255 Uiso 1 1 calc R . . 
O6S O 0.0808(2) 0.5439(3) 0.5726(3) 0.153(3) Uani 1 1 d D . 1 
N6S N 0.1436(8) 0.5344(7) 0.5185(9) 0.258(13) Uiso 0.50 1 d PD . 1 
C16S C 0.1041(7) 0.5264(7) 0.5479(8) 0.153(9) Uiso 0.50 1 d PD . 1 
C17S C 0.1427(5) 0.5817(5) 0.5000 0.062(5) Uiso 0.50 2 d SPD . 1 
C18S C 0.1685(8) 0.4956(8) 0.5000 0.112(8) Uiso 0.50 2 d SPD . 1 
N6S' N 0.0379(7) 0.4755(8) 0.5848(8) 0.209(10) Uiso 0.50 1 d PD A 2 
C16' C 0.0695(8) 0.5076(7) 0.5659(9) 0.161(10) Uiso 0.50 1 d PD A 2 
C17' C 0.0000 0.5000 0.6108(7) 0.194(8) Uiso 1 2 d SD . 2 
C18' C 0.0386(9) 0.4272(8) 0.5714(10) 0.192(11) Uiso 0.50 1 d PD A 2 
O1W O -0.0290(2) 0.86875(16) 0.63219(17) 0.119(2) Uani 1 1 d . . . 
O2W O -0.16213(19) 0.8996(2) 0.5000 0.122(4) Uani 1 2 d S . . 
O3W O -0.1227(5) 0.9226(5) 0.5920(7) 0.412(12) Uani 1 1 d . . . 
O7S O 0.0457(8) 0.6462(12) 0.8927(5) 0.57(2) Uani 1 1 d D . . 
N7S N 0.0336(3) 0.6591(3) 0.8237(3) 0.123(3) Uani 1 1 d D . . 
C19S C 0.0343(6) 0.6284(5) 0.8554(7) 0.37(2) Uani 1 1 d D . . 
H19A H 0.0276 0.5990 0.8512 0.440 Uiso 1 1 calc R . . 
C20S C 0.0446(4) 0.7013(5) 0.8400(7) 0.260(11) Uani 1 1 d D . . 
H20B H 0.0488 0.7000 0.8717 0.389 Uiso 1 1 calc R . . 
H20C H 0.0214 0.7213 0.8333 0.389 Uiso 1 1 calc R . . 
H20D H 0.0711 0.7111 0.8260 0.389 Uiso 1 1 calc R . . 
C21S C 0.0260(3) 0.6559(4) 0.7772(4) 0.146(4) Uani 1 1 d D . . 
H21A H 0.0196 0.6261 0.7695 0.219 Uiso 1 1 calc R . . 
H21B H 0.0515 0.6654 0.7613 0.219 Uiso 1 1 calc R . . 
H21C H 0.0017 0.6741 0.7692 0.219 Uiso 1 1 calc R . . 
 
loop_ 
 _atom_site_aniso_label 
 _atom_site_aniso_U_11 
 _atom_site_aniso_U_22 
 _atom_site_aniso_U_33 
 _atom_site_aniso_U_23 
 _atom_site_aniso_U_13 
 _atom_site_aniso_U_12 
Cu1 0.0347(3) 0.0387(4) 0.0323(4) 0.0094(3) 0.0037(3) 0.0002(3) 
Cu2 0.0325(3) 0.0415(4) 0.0344(4) 0.0112(3) 0.0038(3) -0.0004(3) 
Cu3 0.0357(5) 0.0394(5) 0.0284(5) 0.000 0.000 -0.0063(4) 
Cu4 0.0381(5) 0.0418(5) 0.0276(5) 0.000 0.000 -0.0085(4) 
O1 0.043(2) 0.056(2) 0.034(2) 0.0160(18) -0.0046(16) -0.0089(17) 
O2 0.044(2) 0.059(2) 0.042(2) 0.0173(19) -0.0099(17) -0.0091(19) 
O3 0.038(2) 0.049(2) 0.040(2) 0.0023(16) -0.0036(16) -0.0041(17) 
O4 0.046(2) 0.055(2) 0.039(2) 0.0127(18) -0.0075(17) -0.0079(18) 
O5 0.051(2) 0.043(2) 0.041(2) 0.0110(17) 0.0069(17) 0.0056(17) 
O6 0.056(2) 0.047(2) 0.044(2) 0.0137(18) 0.0135(19) 0.0134(18) 
O7 0.048(2) 0.040(2) 0.047(2) -0.0005(17) 0.0110(18) 0.0074(18) 
O8 0.057(2) 0.041(2) 0.050(2) 0.0065(18) 0.0121(19) 0.0137(18) 
O9 0.051(2) 0.045(2) 0.046(2) 0.0052(18) 0.0124(19) 0.0027(17) 
O10 0.053(2) 0.047(2) 0.051(2) 0.0076(19) 0.0185(19) 0.0019(19) 
O11 0.047(2) 0.046(2) 0.039(2) 0.0011(17) 0.0066(17) 0.0017(18) 
O12 0.051(2) 0.053(2) 0.048(2) 0.0045(19) 0.0191(18) 0.0046(19) 
N1 0.084(4) 0.082(4) 0.071(4) 0.037(3) -0.022(3) -0.038(3) 
N2 0.062(3) 0.070(3) 0.047(3) 0.013(3) 0.016(2) 0.010(3) 
N3 0.116(5) 0.050(3) 0.136(6) 0.020(4) 0.076(5) 0.009(3) 
C1 0.039(3) 0.049(3) 0.038(3) 0.006(3) 0.001(2) 0.000(3) 
C2 0.037(3) 0.040(3) 0.042(3) 0.004(2) 0.000(2) -0.004(2) 
C3 0.041(3) 0.045(3) 0.031(3) 0.000(2) 0.000(2) 0.000(2) 
C4 0.039(3) 0.051(3) 0.042(3) 0.007(3) 0.001(2) -0.005(3) 
C5 0.050(3) 0.055(3) 0.040(3) 0.012(3) 0.001(3) -0.012(3) 
C6 0.049(3) 0.054(3) 0.039(3) 0.008(3) -0.007(3) -0.003(3) 
C7 0.040(3) 0.046(3) 0.042(4) 0.000(3) 0.005(3) -0.004(3) 
C8 0.048(3) 0.048(3) 0.030(3) 0.002(2) 0.002(2) 0.002(3) 
C9 0.040(3) 0.034(3) 0.038(3) 0.002(2) -0.002(2) 0.002(2) 
C10 0.047(3) 0.041(3) 0.038(3) 0.001(2) 0.006(2) -0.007(3) 
C11 0.037(3) 0.040(3) 0.042(3) -0.003(2) 0.005(2) -0.001(2) 
C12 0.048(3) 0.043(3) 0.043(3) -0.007(3) 0.005(3) -0.006(3) 
C13 0.044(3) 0.051(3) 0.036(3) 0.004(3) 0.006(2) -0.007(3) 
C14 0.035(3) 0.046(3) 0.043(3) 0.007(3) 0.001(2) -0.001(2) 
C15 0.031(3) 0.043(3) 0.043(3) 0.005(3) 0.000(2) 0.002(2) 
C16 0.041(3) 0.032(3) 0.045(3) -0.007(2) 0.001(3) -0.004(2) 
C17 0.042(3) 0.048(3) 0.045(3) 0.002(3) 0.009(3) -0.004(3) 
C18 0.041(3) 0.049(3) 0.045(3) 0.000(3) -0.001(3) -0.002(3) 
C19 0.039(3) 0.043(3) 0.036(3) -0.005(2) 0.007(2) 0.000(2) 
C20 0.052(4) 0.056(4) 0.064(4) -0.005(3) 0.019(3) 0.003(3) 
C21 0.075(4) 0.046(4) 0.081(5) 0.000(3) 0.025(4) 0.005(3) 
C22 0.061(4) 0.051(4) 0.071(5) 0.003(3) 0.029(3) -0.003(3) 
C23 0.033(3) 0.052(4) 0.043(3) 0.002(3) 0.004(2) -0.005(3) 
C24 0.046(3) 0.048(3) 0.035(3) -0.001(3) 0.000(3) -0.002(3) 
O1S 0.061(2) 0.062(2) 0.038(2) 0.018(2) -0.0025(19) -0.007(2) 
N1S 0.127(6) 0.151(7) 0.067(5) 0.036(5) -0.015(4) -0.029(5) 
C1S 0.102(7) 0.145(8) 0.081(7) 0.047(7) 0.000(5) -0.007(6) 
C2S 0.138(8) 0.114(8) 0.167(11) 0.097(7) 0.018(7) 0.008(6) 
C3S 0.39(3) 0.37(2) 0.076(9) 0.075(12) -0.086(12) -0.20(2) 
O2S 0.085(5) 0.165(8) 0.032(4) 0.000 0.000 -0.079(5) 
N2S 0.177(12) 0.109(9) 0.098(9) 0.000 0.000 -0.058(9) 
C4S 0.136(12) 0.094(10) 0.154(15) 0.000 0.000 -0.050(9) 
C5S 0.16(2) 0.70(7) 0.28(3) 0.000 0.000 -0.27(3) 
C6S 0.26(2) 0.071(9) 0.126(13) 0.000 0.000 0.026(11) 
O3S 0.078(4) 0.140(5) 0.074(4) 0.007(3) 0.016(3) 0.015(3) 
N3S 0.064(3) 0.062(3) 0.055(4) -0.010(3) 0.010(3) 0.007(3) 
C7S 0.076(5) 0.073(5) 0.066(5) -0.011(4) 0.018(4) -0.001(4) 
C8S 0.094(5) 0.084(5) 0.053(4) -0.006(4) 0.018(4) 0.021(4) 
C9S 0.065(5) 0.107(6) 0.088(6) -0.006(5) 0.018(4) 0.011(4) 
O4S 0.111(4) 0.075(3) 0.077(4) -0.014(3) 0.035(3) -0.014(3) 
N4S 0.062(3) 0.067(3) 0.052(3) -0.004(3) 0.014(3) 0.003(3) 
C10S 0.079(5) 0.069(4) 0.053(4) 0.008(4) 0.014(4) -0.002(4) 
C11S 0.061(4) 0.089(5) 0.079(5) 0.000(4) 0.020(4) -0.001(4) 
C12S 0.069(4) 0.070(4) 0.060(4) -0.002(3) 0.014(3) 0.003(3) 
O5S 0.100(4) 0.142(6) 0.212(8) -0.117(6) 0.032(5) -0.032(4) 
N5S 0.100(6) 0.091(5) 0.186(10) -0.026(6) -0.034(6) 0.017(5) 
C13S 0.092(7) 0.098(7) 0.196(13) -0.032(8) 0.019(7) 0.000(6) 
C14S 0.109(8) 0.159(10) 0.158(12) -0.037(9) 0.022(8) -0.006(7) 
C15S 0.175(11) 0.096(7) 0.240(15) -0.040(8) -0.113(11) -0.005(7) 
O6S 0.130(6) 0.169(7) 0.160(7) -0.083(6) 0.002(5) 0.020(5) 
O1W 0.228(7) 0.071(3) 0.059(3) 0.035(3) 0.015(4) -0.035(4) 
O2W 0.040(4) 0.062(4) 0.265(12) 0.000 0.000 -0.029(3) 
O3W 0.315(16) 0.40(2) 0.52(3) 0.162(19) 0.221(18) -0.071(14) 
O7S 0.38(3) 1.15(7) 0.165(15) 0.02(3) 0.053(17) -0.11(3) 
N7S 0.101(6) 0.106(6) 0.161(9) 0.047(6) 0.041(6) 0.036(5) 
C19S 0.36(3) 0.27(2) 0.47(4) 0.25(3) 0.28(3) 0.23(2) 
C20S 0.122(11) 0.25(2) 0.41(3) -0.10(2) -0.038(15) 0.035(13) 
C21S 0.123(8) 0.213(13) 0.101(9) -0.002(9) -0.001(7) 0.037(8) 
 
_geom_special_details 
; 
 All esds (except the esd in the dihedral angle between two l.s. planes) 
 are estimated using the full covariance matrix.  The cell esds are taken 
 into account individually in the estimation of esds in distances, angles 
 and torsion angles; correlations between esds in cell parameters are only 
 used when they are defined by crystal symmetry.  An approximate (isotropic) 
 treatment of cell esds is used for estimating esds involving l.s. planes. 
; 
 
loop_ 
 _geom_bond_atom_site_label_1 
 _geom_bond_atom_site_label_2 
 _geom_bond_distance 
 _geom_bond_site_symmetry_2 
 _geom_bond_publ_flag 
Cu1 O9 1.961(3) . ? 
Cu1 O1 1.967(3) . ? 
Cu1 O5 1.972(3) . ? 
Cu1 O7 1.973(3) 3_665 ? 
Cu1 O1S 2.142(4) . ? 
Cu1 Cu2 2.6222(8) . ? 
Cu2 O10 1.950(4) . ? 
Cu2 O6 1.959(3) . ? 
Cu2 O8 1.958(4) 3_665 ? 
Cu2 O2 1.970(3) . ? 
Cu2 O1W 2.130(4) . ? 
Cu3 O11 1.972(3) 4_465 ? 
Cu3 O11 1.972(3) 11_466 ? 
Cu3 O3 1.975(3) . ? 
Cu3 O3 1.975(3) 10_556 ? 
Cu3 O2S 2.167(6) . ? 
Cu3 Cu4 2.6289(11) . ? 
Cu4 O4 1.953(3) 10_556 ? 
Cu4 O4 1.953(3) . ? 
Cu4 O12 1.955(3) 4_465 ? 
Cu4 O12 1.955(3) 11_466 ? 
Cu4 O2W 2.131(6) . ? 
O1 C7 1.259(6) . ? 
O2 C7 1.265(6) . ? 
O3 C8 1.273(6) . ? 
O4 C8 1.254(6) . ? 
O5 C15 1.254(6) . ? 
O6 C15 1.250(6) . ? 
O7 C16 1.256(6) . ? 
O7 Cu1 1.973(3) 4_465 ? 
O8 C16 1.268(6) . ? 
O8 Cu2 1.958(4) 4_465 ? 
O9 C23 1.272(6) . ? 
O10 C23 1.238(6) . ? 
O11 C24 1.257(6) . ? 
O11 Cu3 1.972(3) 3_665 ? 
O12 C24 1.260(6) . ? 
O12 Cu4 1.955(3) 3_665 ? 
N1 C5 1.380(7) . ? 
N1 H1A 0.8800 . ? 
N1 H1B 0.8800 . ? 
N2 C13 1.399(7) . ? 
N2 H2A 0.8800 . ? 
N2 H2B 0.8800 . ? 
N3 C21 1.400(8) . ? 
N3 H3A 0.8800 . ? 
N3 H3B 0.8800 . ? 
C1 C2 1.384(7) . ? 
C1 C6 1.392(7) . ? 
C1 C7 1.492(7) . ? 
C2 C3 1.384(7) . ? 
C2 H2C 0.9500 . ? 
C3 C4 1.394(7) . ? 
C3 C8 1.511(7) . ? 
C4 C5 1.403(7) . ? 
C4 H4A 0.9500 . ? 
C5 C6 1.386(7) . ? 
C6 H6A 0.9500 . ? 
C9 C14 1.375(7) . ? 
C9 C10 1.387(7) . ? 
C9 C15 1.509(7) . ? 
C10 C11 1.386(7) . ? 
C10 H10A 0.9500 . ? 
C11 C12 1.396(7) . ? 
C11 C16 1.491(7) . ? 
C12 C13 1.388(7) . ? 
C12 H12A 0.9500 . ? 
C13 C14 1.390(7) . ? 
C14 H14A 0.9500 . ? 
C17 C22 1.384(8) . ? 
C17 C18 1.384(7) . ? 
C17 C23 1.492(7) . ? 
C18 C19 1.390(7) . ? 
C18 H18A 0.9500 . ? 
C19 C20 1.368(7) . ? 
C19 C24 1.495(7) . ? 
C20 C21 1.411(8) . ? 
C20 H20A 0.9500 . ? 
C21 C22 1.411(8) . ? 
C22 H22A 0.9500 . ? 
O1S C1S 1.273(10) . ? 
N1S C1S 1.321(10) . ? 
N1S C3S 1.470(14) . ? 
N1S C2S 1.526(11) . ? 
C1S H1SA 0.9500 . ? 
C2S H2SA 0.9800 . ? 
C2S H2SB 0.9800 . ? 
C2S H2SC 0.9800 . ? 
C3S H3SA 0.9800 . ? 
C3S H3SB 0.9800 . ? 
C3S H3SC 0.9800 . ? 
O2S C4S 1.610(16) . ? 
N2S C4S 1.322(15) . ? 
N2S C6S 1.423(16) . ? 
N2S C5S 1.48(3) . ? 
C4S H4SA 0.9500 . ? 
C5S H5SA 0.9800 . ? 
C5S H5SB 0.9800 . ? 
C5S H5SC 0.9800 . ? 
C6S H6SA 0.9800 . ? 
C6S H6SB 0.9800 . ? 
C6S H6SC 0.9800 . ? 
O3S C7S 1.248(8) . ? 
N3S C7S 1.339(8) . ? 
N3S C9S 1.433(7) . ? 
N3S C8S 1.448(7) . ? 
C7S H7SA 0.9500 . ? 
C8S H8SA 0.9800 . ? 
C8S H8SB 0.9800 . ? 
C8S H8SC 0.9800 . ? 
C9S H9SA 0.9800 . ? 
C9S H9SB 0.9800 . ? 
C9S H9SC 0.9800 . ? 
O4S C10S 1.240(8) . ? 
N4S C10S 1.317(8) . ? 
N4S C11S 1.444(7) . ? 
N4S C12S 1.465(8) . ? 
C10S H10B 0.9500 . ? 
C11S H11A 0.9800 . ? 
C11S H11B 0.9800 . ? 
C11S H11C 0.9800 . ? 
C12S H12B 0.9800 . ? 
C12S H12C 0.9800 . ? 
C12S H12D 0.9800 . ? 
O5S C13S 1.176(11) . ? 
N5S C13S 1.405(12) . ? 
N5S C14S 1.495(14) . ? 
N5S C15S 1.521(13) . ? 
C13S H13A 0.9500 . ? 
C14S H14B 0.9800 . ? 
C14S H14C 0.9800 . ? 
C14S H14D 0.9800 . ? 
C15S H15A 0.9800 . ? 
C15S H15B 0.9800 . ? 
C15S H15C 0.9800 . ? 
O6S C16S 1.18(2) . ? 
N6S N6S 1.13(6) 10_556 ? 
N6S C18S 1.55(2) . ? 
N6S C16S 1.55(2) . ? 
N6S C17S 1.58(2) . ? 
C17S N6S 1.58(2) 10_556 ? 
C18S N6S 1.55(2) 10_556 ? 
N6S' C16' 1.52(2) . ? 
N6S' C18' 1.56(2) . ? 
N6S' C17' 1.62(2) . ? 
C17' N6S' 1.62(2) 2_565 ? 
O7S C19S 1.321(19) . ? 
N7S C19S 1.362(14) . ? 
N7S C20S 1.451(13) . ? 
N7S C21S 1.448(11) . ? 
C19S H19A 0.9500 . ? 
C20S H20B 0.9800 . ? 
C20S H20C 0.9800 . ? 
C20S H20D 0.9800 . ? 
C21S H21A 0.9800 . ? 
C21S H21B 0.9800 . ? 
C21S H21C 0.9800 . ? 
 
loop_ 
 _geom_angle_atom_site_label_1 
 _geom_angle_atom_site_label_2 
 _geom_angle_atom_site_label_3 
 _geom_angle 
 _geom_angle_site_symmetry_1 
 _geom_angle_site_symmetry_3 
 _geom_angle_publ_flag 
O9 Cu1 O1 89.92(16) . . ? 
O9 Cu1 O5 166.88(14) . . ? 
O1 Cu1 O5 89.26(15) . . ? 
O9 Cu1 O7 89.79(15) . 3_665 ? 
O1 Cu1 O7 170.81(14) . 3_665 ? 
O5 Cu1 O7 88.94(15) . 3_665 ? 
O9 Cu1 O1S 99.34(15) . . ? 
O1 Cu1 O1S 96.33(15) . . ? 
O5 Cu1 O1S 93.77(15) . . ? 
O7 Cu1 O1S 92.78(15) 3_665 . ? 
O9 Cu1 Cu2 84.37(10) . . ? 
O1 Cu1 Cu2 85.38(10) . . ? 
O5 Cu1 Cu2 82.51(10) . . ? 
O7 Cu1 Cu2 85.45(10) 3_665 . ? 
O1S Cu1 Cu2 175.90(12) . . ? 
O10 Cu2 O6 169.46(15) . . ? 
O10 Cu2 O8 88.49(16) . 3_665 ? 
O6 Cu2 O8 90.30(16) . 3_665 ? 
O10 Cu2 O2 90.32(16) . . ? 
O6 Cu2 O2 88.42(16) . . ? 
O8 Cu2 O2 166.50(15) 3_665 . ? 
O10 Cu2 O1W 95.5(2) . . ? 
O6 Cu2 O1W 95.0(2) . . ? 
O8 Cu2 O1W 96.1(2) 3_665 . ? 
O2 Cu2 O1W 97.4(2) . . ? 
O10 Cu2 Cu1 83.67(11) . . ? 
O6 Cu2 Cu1 85.79(10) . . ? 
O8 Cu2 Cu1 83.14(11) 3_665 . ? 
O2 Cu2 Cu1 83.37(10) . . ? 
O1W Cu2 Cu1 178.9(2) . . ? 
O11 Cu3 O11 88.2(2) 4_465 11_466 ? 
O11 Cu3 O3 89.81(14) 4_465 . ? 
O11 Cu3 O3 168.21(15) 11_466 . ? 
O11 Cu3 O3 168.21(15) 4_465 10_556 ? 
O11 Cu3 O3 89.81(14) 11_466 10_556 ? 
O3 Cu3 O3 89.8(2) . 10_556 ? 
O11 Cu3 O2S 98.2(2) 4_465 . ? 
O11 Cu3 O2S 98.2(2) 11_466 . ? 
O3 Cu3 O2S 93.6(2) . . ? 
O3 Cu3 O2S 93.6(2) 10_556 . ? 
O11 Cu3 Cu4 84.78(11) 4_465 . ? 
O11 Cu3 Cu4 84.78(11) 11_466 . ? 
O3 Cu3 Cu4 83.47(10) . . ? 
O3 Cu3 Cu4 83.47(10) 10_556 . ? 
O2S Cu3 Cu4 175.8(3) . . ? 
O4 Cu4 O4 90.4(2) 10_556 . ? 
O4 Cu4 O12 168.90(16) 10_556 4_465 ? 
O4 Cu4 O12 88.74(16) . 4_465 ? 
O4 Cu4 O12 88.74(16) 10_556 11_466 ? 
O4 Cu4 O12 168.90(16) . 11_466 ? 
O12 Cu4 O12 90.0(2) 4_465 11_466 ? 
O4 Cu4 O2W 95.49(17) 10_556 . ? 
O4 Cu4 O2W 95.49(17) . . ? 
O12 Cu4 O2W 95.61(17) 4_465 . ? 
O12 Cu4 O2W 95.61(17) 11_466 . ? 
O4 Cu4 Cu3 85.38(11) 10_556 . ? 
O4 Cu4 Cu3 85.38(11) . . ? 
O12 Cu4 Cu3 83.52(11) 4_465 . ? 
O12 Cu4 Cu3 83.52(11) 11_466 . ? 
O2W Cu4 Cu3 178.75(19) . . ? 
C7 O1 Cu1 121.8(3) . . ? 
C7 O2 Cu2 123.7(3) . . ? 
C8 O3 Cu3 123.1(3) . . ? 
C8 O4 Cu4 122.4(3) . . ? 
C15 O5 Cu1 124.0(3) . . ? 
C15 O6 Cu2 121.2(3) . . ? 
C16 O7 Cu1 121.6(3) . 4_465 ? 
C16 O8 Cu2 124.7(3) . 4_465 ? 
C23 O9 Cu1 122.3(3) . . ? 
C23 O10 Cu2 124.6(3) . . ? 
C24 O11 Cu3 122.4(3) . 3_665 ? 
C24 O12 Cu4 124.7(3) . 3_665 ? 
C5 N1 H1A 120.0 . . ? 
C5 N1 H1B 120.0 . . ? 
H1A N1 H1B 120.0 . . ? 
C13 N2 H2A 120.0 . . ? 
C13 N2 H2B 120.0 . . ? 
H2A N2 H2B 120.0 . . ? 
C21 N3 H3A 120.0 . . ? 
C21 N3 H3B 120.0 . . ? 
H3A N3 H3B 120.0 . . ? 
C2 C1 C6 120.2(5) . . ? 
C2 C1 C7 119.9(5) . . ? 
C6 C1 C7 119.9(5) . . ? 
C1 C2 C3 119.4(5) . . ? 
C1 C2 H2C 120.3 . . ? 
C3 C2 H2C 120.3 . . ? 
C2 C3 C4 120.7(5) . . ? 
C2 C3 C8 119.3(5) . . ? 
C4 C3 C8 120.0(5) . . ? 
C3 C4 C5 120.0(5) . . ? 
C3 C4 H4A 120.0 . . ? 
C5 C4 H4A 120.0 . . ? 
N1 C5 C6 121.1(5) . . ? 
N1 C5 C4 120.4(5) . . ? 
C6 C5 C4 118.5(5) . . ? 
C5 C6 C1 121.1(5) . . ? 
C5 C6 H6A 119.5 . . ? 
C1 C6 H6A 119.5 . . ? 
O1 C7 O2 125.3(5) . . ? 
O1 C7 C1 117.9(5) . . ? 
O2 C7 C1 116.8(5) . . ? 
O4 C8 O3 125.6(5) . . ? 
O4 C8 C3 116.9(5) . . ? 
O3 C8 C3 117.5(5) . . ? 
C14 C9 C10 120.7(5) . . ? 
C14 C9 C15 119.6(4) . . ? 
C10 C9 C15 119.6(5) . . ? 
C11 C10 C9 119.5(5) . . ? 
C11 C10 H10A 120.2 . . ? 
C9 C10 H10A 120.2 . . ? 
C10 C11 C12 119.7(5) . . ? 
C10 C11 C16 119.8(5) . . ? 
C12 C11 C16 120.5(5) . . ? 
C13 C12 C11 120.6(5) . . ? 
C13 C12 H12A 119.7 . . ? 
C11 C12 H12A 119.7 . . ? 
C12 C13 C14 118.9(5) . . ? 
C12 C13 N2 121.0(5) . . ? 
C14 C13 N2 120.0(5) . . ? 
C9 C14 C13 120.5(5) . . ? 
C9 C14 H14A 119.7 . . ? 
C13 C14 H14A 119.7 . . ? 
O6 C15 O5 125.8(5) . . ? 
O6 C15 C9 117.5(4) . . ? 
O5 C15 C9 116.7(5) . . ? 
O7 C16 O8 124.7(5) . . ? 
O7 C16 C11 118.2(5) . . ? 
O8 C16 C11 117.0(4) . . ? 
C22 C17 C18 119.9(5) . . ? 
C22 C17 C23 120.4(5) . . ? 
C18 C17 C23 119.6(5) . . ? 
C17 C18 C19 120.0(5) . . ? 
C17 C18 H18A 120.0 . . ? 
C19 C18 H18A 120.0 . . ? 
C20 C19 C18 120.5(5) . . ? 
C20 C19 C24 120.5(5) . . ? 
C18 C19 C24 119.0(5) . . ? 
C19 C20 C21 121.2(5) . . ? 
C19 C20 H20A 119.4 . . ? 
C21 C20 H20A 119.4 . . ? 
N3 C21 C22 120.5(6) . . ? 
N3 C21 C20 122.1(5) . . ? 
C22 C21 C20 117.3(5) . . ? 
C17 C22 C21 121.1(5) . . ? 
C17 C22 H22A 119.5 . . ? 
C21 C22 H22A 119.5 . . ? 
O10 C23 O9 124.6(5) . . ? 
O10 C23 C17 118.3(5) . . ? 
O9 C23 C17 117.2(5) . . ? 
O11 C24 O12 124.6(5) . . ? 
O11 C24 C19 118.2(5) . . ? 
O12 C24 C19 117.2(5) . . ? 
C1S O1S Cu1 114.4(5) . . ? 
C1S N1S C3S 121.1(10) . . ? 
C1S N1S C2S 118.9(9) . . ? 
C3S N1S C2S 119.9(9) . . ? 
O1S C1S N1S 124.2(10) . . ? 
O1S C1S H1SA 117.9 . . ? 
N1S C1S H1SA 117.9 . . ? 
N1S C2S H2SA 109.5 . . ? 
N1S C2S H2SB 109.5 . . ? 
H2SA C2S H2SB 109.5 . . ? 
N1S C2S H2SC 109.5 . . ? 
H2SA C2S H2SC 109.5 . . ? 
H2SB C2S H2SC 109.5 . . ? 
N1S C3S H3SA 109.5 . . ? 
N1S C3S H3SB 109.5 . . ? 
H3SA C3S H3SB 109.5 . . ? 
N1S C3S H3SC 109.5 . . ? 
H3SA C3S H3SC 109.5 . . ? 
H3SB C3S H3SC 109.5 . . ? 
C4S O2S Cu3 105.3(6) . . ? 
C4S N2S C6S 112.1(15) . . ? 
C4S N2S C5S 123.9(18) . . ? 
C6S N2S C5S 123.9(17) . . ? 
N2S C4S O2S 116.3(13) . . ? 
N2S C4S H4SA 121.9 . . ? 
O2S C4S H4SA 121.8 . . ? 
N2S C5S H5SA 109.5 . . ? 
N2S C5S H5SB 109.5 . . ? 
H5SA C5S H5SB 109.5 . . ? 
N2S C5S H5SC 109.5 . . ? 
H5SA C5S H5SC 109.5 . . ? 
H5SB C5S H5SC 109.5 . . ? 
N2S C6S H6SA 109.5 . . ? 
N2S C6S H6SB 109.5 . . ? 
H6SA C6S H6SB 109.5 . . ? 
N2S C6S H6SC 109.5 . . ? 
H6SA C6S H6SC 109.5 . . ? 
H6SB C6S H6SC 109.5 . . ? 
C7S N3S C9S 119.5(6) . . ? 
C7S N3S C8S 121.1(6) . . ? 
C9S N3S C8S 118.9(6) . . ? 
O3S C7S N3S 125.7(7) . . ? 
O3S C7S H7SA 117.2 . . ? 
N3S C7S H7SA 117.2 . . ? 
N3S C8S H8SA 109.5 . . ? 
N3S C8S H8SB 109.5 . . ? 
H8SA C8S H8SB 109.5 . . ? 
N3S C8S H8SC 109.5 . . ? 
H8SA C8S H8SC 109.5 . . ? 
H8SB C8S H8SC 109.5 . . ? 
N3S C9S H9SA 109.5 . . ? 
N3S C9S H9SB 109.5 . . ? 
H9SA C9S H9SB 109.5 . . ? 
N3S C9S H9SC 109.5 . . ? 
H9SA C9S H9SC 109.5 . . ? 
H9SB C9S H9SC 109.5 . . ? 
C10S N4S C11S 122.5(6) . . ? 
C10S N4S C12S 120.8(5) . . ? 
C11S N4S C12S 116.7(5) . . ? 
O4S C10S N4S 124.9(6) . . ? 
O4S C10S H10B 117.6 . . ? 
N4S C10S H10B 117.6 . . ? 
N4S C11S H11A 109.5 . . ? 
N4S C11S H11B 109.5 . . ? 
H11A C11S H11B 109.5 . . ? 
N4S C11S H11C 109.5 . . ? 
H11A C11S H11C 109.5 . . ? 
H11B C11S H11C 109.5 . . ? 
N4S C12S H12B 109.5 . . ? 
N4S C12S H12C 109.5 . . ? 
H12B C12S H12C 109.5 . . ? 
N4S C12S H12D 109.5 . . ? 
H12B C12S H12D 109.5 . . ? 
H12C C12S H12D 109.5 . . ? 
C13S N5S C14S 120.4(9) . . ? 
C13S N5S C15S 115.6(11) . . ? 
C14S N5S C15S 124.0(10) . . ? 
O5S C13S N5S 128.1(12) . . ? 
O5S C13S H13A 116.0 . . ? 
N5S C13S H13A 116.0 . . ? 
N5S C14S H14B 109.5 . . ? 
N5S C14S H14C 109.5 . . ? 
H14B C14S H14C 109.5 . . ? 
N5S C14S H14D 109.5 . . ? 
H14B C14S H14D 109.5 . . ? 
H14C C14S H14D 109.5 . . ? 
N5S C15S H15A 109.5 . . ? 
N5S C15S H15B 109.5 . . ? 
H15A C15S H15B 109.5 . . ? 
N5S C15S H15C 109.5 . . ? 
H15A C15S H15C 109.5 . . ? 
H15B C15S H15C 109.5 . . ? 
N6S N6S C18S 68.5(11) 10_556 . ? 
N6S N6S C16S 125.6(15) 10_556 . ? 
C18S N6S C16S 119.2(18) . . ? 
N6S N6S C17S 69.0(10) 10_556 . ? 
C18S N6S C17S 127.5(19) . . ? 
C16S N6S C17S 110.2(17) . . ? 
O6S C16S N6S 142(2) . . ? 
N6S C17S N6S 42(2) 10_556 . ? 
N6S C18S N6S 43(2) . 10_556 ? 
C16' N6S' C18' 122(2) . . ? 
C16' N6S' C17' 110.5(17) . . ? 
C18' N6S' C17' 126.4(18) . . ? 
N6S' C17' N6S' 121(2) 2_565 . ? 
C19S N7S C20S 113.0(14) . . ? 
C19S N7S C21S 130.9(13) . . ? 
C20S N7S C21S 116.0(11) . . ? 
O7S C19S N7S 109.0(18) . . ? 
O7S C19S H19A 125.5 . . ? 
N7S C19S H19A 125.5 . . ? 
N7S C20S H20B 109.5 . . ? 
N7S C20S H20C 109.5 . . ? 
H20B C20S H20C 109.5 . . ? 
N7S C20S H20D 109.5 . . ? 
H20B C20S H20D 109.5 . . ? 
H20C C20S H20D 109.5 . . ? 
N7S C21S H21A 109.5 . . ? 
N7S C21S H21B 109.5 . . ? 
H21A C21S H21B 109.5 . . ? 
N7S C21S H21C 109.5 . . ? 
H21A C21S H21C 109.5 . . ? 
H21B C21S H21C 109.5 . . ? 
 
loop_ 
 _geom_torsion_atom_site_label_1 
 _geom_torsion_atom_site_label_2 
 _geom_torsion_atom_site_label_3 
 _geom_torsion_atom_site_label_4 
 _geom_torsion 
 _geom_torsion_site_symmetry_1 
 _geom_torsion_site_symmetry_2 
 _geom_torsion_site_symmetry_3 
 _geom_torsion_site_symmetry_4 
 _geom_torsion_publ_flag 
O9 Cu1 Cu2 O10 -5.13(16) . . . . ? 
O1 Cu1 Cu2 O10 -95.50(16) . . . . ? 
O5 Cu1 Cu2 O10 174.64(16) . . . . ? 
O7 Cu1 Cu2 O10 85.11(16) 3_665 . . . ? 
O1S Cu1 Cu2 O10 149.7(15) . . . . ? 
O9 Cu1 Cu2 O6 174.82(16) . . . . ? 
O1 Cu1 Cu2 O6 84.45(16) . . . . ? 
O5 Cu1 Cu2 O6 -5.41(16) . . . . ? 
O7 Cu1 Cu2 O6 -94.94(16) 3_665 . . . ? 
O1S Cu1 Cu2 O6 -30.4(15) . . . . ? 
O9 Cu1 Cu2 O8 -94.37(16) . . . 3_665 ? 
O1 Cu1 Cu2 O8 175.26(16) . . . 3_665 ? 
O5 Cu1 Cu2 O8 85.40(16) . . . 3_665 ? 
O7 Cu1 Cu2 O8 -4.13(16) 3_665 . . 3_665 ? 
O1S Cu1 Cu2 O8 60.4(15) . . . 3_665 ? 
O9 Cu1 Cu2 O2 85.93(16) . . . . ? 
O1 Cu1 Cu2 O2 -4.44(16) . . . . ? 
O5 Cu1 Cu2 O2 -94.30(16) . . . . ? 
O7 Cu1 Cu2 O2 176.17(16) 3_665 . . . ? 
O1S Cu1 Cu2 O2 -119.3(15) . . . . ? 
O9 Cu1 Cu2 O1W -48(8) . . . . ? 
O1 Cu1 Cu2 O1W -139(8) . . . . ? 
O5 Cu1 Cu2 O1W 132(8) . . . . ? 
O7 Cu1 Cu2 O1W 42(8) 3_665 . . . ? 
O1S Cu1 Cu2 O1W 107(8) . . . . ? 
O11 Cu3 Cu4 O4 -178.95(15) 4_465 . . 10_556 ? 
O11 Cu3 Cu4 O4 -90.28(15) 11_466 . . 10_556 ? 
O3 Cu3 Cu4 O4 90.64(15) . . . 10_556 ? 
O3 Cu3 Cu4 O4 0.12(15) 10_556 . . 10_556 ? 
O2S Cu3 Cu4 O4 45.38(11) . . . 10_556 ? 
O11 Cu3 Cu4 O4 90.28(15) 4_465 . . . ? 
O11 Cu3 Cu4 O4 178.95(15) 11_466 . . . ? 
O3 Cu3 Cu4 O4 -0.12(15) . . . . ? 
O3 Cu3 Cu4 O4 -90.64(15) 10_556 . . . ? 
O2S Cu3 Cu4 O4 -45.38(11) . . . . ? 
O11 Cu3 Cu4 O12 1.03(15) 4_465 . . 4_465 ? 
O11 Cu3 Cu4 O12 89.70(16) 11_466 . . 4_465 ? 
O3 Cu3 Cu4 O12 -89.38(15) . . . 4_465 ? 
O3 Cu3 Cu4 O12 -179.89(15) 10_556 . . 4_465 ? 
O2S Cu3 Cu4 O12 -134.63(12) . . . 4_465 ? 
O11 Cu3 Cu4 O12 -89.70(16) 4_465 . . 11_466 ? 
O11 Cu3 Cu4 O12 -1.03(15) 11_466 . . 11_466 ? 
O3 Cu3 Cu4 O12 179.89(15) . . . 11_466 ? 
O3 Cu3 Cu4 O12 89.38(15) 10_556 . . 11_466 ? 
O2S Cu3 Cu4 O12 134.63(12) . . . 11_466 ? 
O11 Cu3 Cu4 O2W -44.34(10) 4_465 . . . ? 
O11 Cu3 Cu4 O2W 44.34(10) 11_466 . . . ? 
O3 Cu3 Cu4 O2W -134.74(10) . . . . ? 
O3 Cu3 Cu4 O2W 134.74(10) 10_556 . . . ? 
O2S Cu3 Cu4 O2W 180.0 . . . . ? 
O9 Cu1 O1 C7 -80.5(4) . . . . ? 
O5 Cu1 O1 C7 86.4(4) . . . . ? 
O7 Cu1 O1 C7 7.7(12) 3_665 . . . ? 
O1S Cu1 O1 C7 -179.8(4) . . . . ? 
Cu2 Cu1 O1 C7 3.9(4) . . . . ? 
O10 Cu2 O2 C7 90.3(4) . . . . ? 
O6 Cu2 O2 C7 -79.2(4) . . . . ? 
O8 Cu2 O2 C7 5.5(9) 3_665 . . . ? 
O1W Cu2 O2 C7 -174.0(4) . . . . ? 
Cu1 Cu2 O2 C7 6.8(4) . . . . ? 
O11 Cu3 O3 C8 -83.0(4) 4_465 . . . ? 
O11 Cu3 O3 C8 -2.8(9) 11_466 . . . ? 
O3 Cu3 O3 C8 85.2(4) 10_556 . . . ? 
O2S Cu3 O3 C8 178.8(4) . . . . ? 
Cu4 Cu3 O3 C8 1.7(4) . . . . ? 
O4 Cu4 O4 C8 -86.8(4) 10_556 . . . ? 
O12 Cu4 O4 C8 82.1(4) 4_465 . . . ? 
O12 Cu4 O4 C8 -1.4(11) 11_466 . . . ? 
O2W Cu4 O4 C8 177.6(4) . . . . ? 
Cu3 Cu4 O4 C8 -1.5(4) . . . . ? 
O9 Cu1 O5 C15 9.8(9) . . . . ? 
O1 Cu1 O5 C15 -76.7(4) . . . . ? 
O7 Cu1 O5 C15 94.3(4) 3_665 . . . ? 
O1S Cu1 O5 C15 -173.0(4) . . . . ? 
Cu2 Cu1 O5 C15 8.7(4) . . . . ? 
O10 Cu2 O6 C15 4.5(12) . . . . ? 
O8 Cu2 O6 C15 -78.8(4) 3_665 . . . ? 
O2 Cu2 O6 C15 87.8(4) . . . . ? 
O1W Cu2 O6 C15 -175.0(4) . . . . ? 
Cu1 Cu2 O6 C15 4.3(4) . . . . ? 
O1 Cu1 O9 C23 92.4(4) . . . . ? 
O5 Cu1 O9 C23 6.0(9) . . . . ? 
O7 Cu1 O9 C23 -78.4(4) 3_665 . . . ? 
O1S Cu1 O9 C23 -171.2(4) . . . . ? 
Cu2 Cu1 O9 C23 7.1(4) . . . . ? 
O6 Cu2 O10 C23 5.1(12) . . . . ? 
O8 Cu2 O10 C23 88.6(4) 3_665 . . . ? 
O2 Cu2 O10 C23 -78.0(4) . . . . ? 
O1W Cu2 O10 C23 -175.4(5) . . . . ? 
Cu1 Cu2 O10 C23 5.3(4) . . . . ? 
C6 C1 C2 C3 1.6(8) . . . . ? 
C7 C1 C2 C3 -177.3(5) . . . . ? 
C1 C2 C3 C4 -2.6(8) . . . . ? 
C1 C2 C3 C8 176.0(5) . . . . ? 
C2 C3 C4 C5 1.7(8) . . . . ? 
C8 C3 C4 C5 -176.8(5) . . . . ? 
C3 C4 C5 N1 -179.0(5) . . . . ? 
C3 C4 C5 C6 0.2(8) . . . . ? 
N1 C5 C6 C1 178.0(6) . . . . ? 
C4 C5 C6 C1 -1.3(9) . . . . ? 
C2 C1 C6 C5 0.4(8) . . . . ? 
C7 C1 C6 C5 179.2(5) . . . . ? 
Cu1 O1 C7 O2 0.0(7) . . . . ? 
Cu1 O1 C7 C1 -179.8(3) . . . . ? 
Cu2 O2 C7 O1 -6.2(8) . . . . ? 
Cu2 O2 C7 C1 173.6(3) . . . . ? 
C2 C1 C7 O1 168.7(5) . . . . ? 
C6 C1 C7 O1 -10.2(8) . . . . ? 
C2 C1 C7 O2 -11.1(7) . . . . ? 
C6 C1 C7 O2 170.0(5) . . . . ? 
Cu4 O4 C8 O3 3.4(7) . . . . ? 
Cu4 O4 C8 C3 -176.9(3) . . . . ? 
Cu3 O3 C8 O4 -3.6(7) . . . . ? 
Cu3 O3 C8 C3 176.7(3) . . . . ? 
C2 C3 C8 O4 8.1(7) . . . . ? 
C4 C3 C8 O4 -173.3(5) . . . . ? 
C2 C3 C8 O3 -172.2(5) . . . . ? 
C4 C3 C8 O3 6.4(7) . . . . ? 
C14 C9 C10 C11 -1.1(8) . . . . ? 
C15 C9 C10 C11 176.0(5) . . . . ? 
C9 C10 C11 C12 0.7(8) . . . . ? 
C9 C10 C11 C16 -176.4(5) . . . . ? 
C10 C11 C12 C13 1.1(8) . . . . ? 
C16 C11 C12 C13 178.2(5) . . . . ? 
C11 C12 C13 C14 -2.4(8) . . . . ? 
C11 C12 C13 N2 179.6(5) . . . . ? 
C10 C9 C14 C13 -0.2(8) . . . . ? 
C15 C9 C14 C13 -177.3(5) . . . . ? 
C12 C13 C14 C9 1.9(8) . . . . ? 
N2 C13 C14 C9 180.0(5) . . . . ? 
Cu2 O6 C15 O5 1.0(7) . . . . ? 
Cu2 O6 C15 C9 -179.2(3) . . . . ? 
Cu1 O5 C15 O6 -8.7(7) . . . . ? 
Cu1 O5 C15 C9 171.6(3) . . . . ? 
C14 C9 C15 O6 -178.4(5) . . . . ? 
C10 C9 C15 O6 4.5(7) . . . . ? 
C14 C9 C15 O5 1.4(7) . . . . ? 
C10 C9 C15 O5 -175.7(5) . . . . ? 
Cu1 O7 C16 O8 -1.5(7) 4_465 . . . ? 
Cu1 O7 C16 C11 178.3(3) 4_465 . . . ? 
Cu2 O8 C16 O7 -4.3(7) 4_465 . . . ? 
Cu2 O8 C16 C11 175.9(3) 4_465 . . . ? 
C10 C11 C16 O7 168.4(5) . . . . ? 
C12 C11 C16 O7 -8.6(7) . . . . ? 
C10 C11 C16 O8 -11.7(7) . . . . ? 
C12 C11 C16 O8 171.2(5) . . . . ? 
C22 C17 C18 C19 1.3(8) . . . . ? 
C23 C17 C18 C19 177.2(5) . . . . ? 
C17 C18 C19 C20 1.0(8) . . . . ? 
C17 C18 C19 C24 -177.4(5) . . . . ? 
C18 C19 C20 C21 -2.0(9) . . . . ? 
C24 C19 C20 C21 176.4(6) . . . . ? 
C19 C20 C21 N3 -178.3(7) . . . . ? 
C19 C20 C21 C22 0.7(10) . . . . ? 
C18 C17 C22 C21 -2.6(10) . . . . ? 
C23 C17 C22 C21 -178.5(6) . . . . ? 
N3 C21 C22 C17 -179.4(7) . . . . ? 
C20 C21 C22 C17 1.7(10) . . . . ? 
Cu2 O10 C23 O9 -1.6(8) . . . . ? 
Cu2 O10 C23 C17 178.1(3) . . . . ? 
Cu1 O9 C23 O10 -5.6(7) . . . . ? 
Cu1 O9 C23 C17 174.7(3) . . . . ? 
C22 C17 C23 O10 -173.7(6) . . . . ? 
C18 C17 C23 O10 10.4(8) . . . . ? 
C22 C17 C23 O9 6.1(8) . . . . ? 
C18 C17 C23 O9 -169.8(5) . . . . ? 
Cu3 O11 C24 O12 1.8(7) 3_665 . . . ? 
Cu3 O11 C24 C19 -179.6(3) 3_665 . . . ? 
Cu4 O12 C24 O11 -0.3(8) 3_665 . . . ? 
Cu4 O12 C24 C19 -179.0(3) 3_665 . . . ? 
C20 C19 C24 O11 -9.6(8) . . . . ? 
C18 C19 C24 O11 168.8(5) . . . . ? 
C20 C19 C24 O12 169.2(5) . . . . ? 
C18 C19 C24 O12 -12.4(7) . . . . ? 
O9 Cu1 O1S C1S 133.5(5) . . . . ? 
O1 Cu1 O1S C1S -135.5(5) . . . . ? 
O5 Cu1 O1S C1S -45.9(5) . . . . ? 
O7 Cu1 O1S C1S 43.3(5) 3_665 . . . ? 
Cu2 Cu1 O1S C1S -21.1(18) . . . . ? 
Cu1 O1S C1S N1S -174.4(7) . . . . ? 
C3S N1S C1S O1S 177.6(11) . . . . ? 
C2S N1S C1S O1S -1.9(14) . . . . ? 
O11 Cu3 O2S C4S -135.32(11) 4_465 . . . ? 
O11 Cu3 O2S C4S 135.32(11) 11_466 . . . ? 
O3 Cu3 O2S C4S -45.00(10) . . . . ? 
O3 Cu3 O2S C4S 45.00(10) 10_556 . . . ? 
Cu4 Cu3 O2S C4S 0.0 . . . . ? 
C6S N2S C4S O2S 180.0 . . . . ? 
C5S N2S C4S O2S 0.0 . . . . ? 
Cu3 O2S C4S N2S 180.0 . . . . ? 
C9S N3S C7S O3S 173.5(7) . . . . ? 
C8S N3S C7S O3S 1.1(11) . . . . ? 
C11S N4S C10S O4S 3.5(11) . . . . ? 
C12S N4S C10S O4S -177.4(6) . . . . ? 
C14S N5S C13S O5S -6.7(17) . . . . ? 
C15S N5S C13S O5S 173.6(11) . . . . ? 
N6S N6S C16S O6S -111(4) 10_556 . . . ? 
C18S N6S C16S O6S 166(3) . . . . ? 
C17S N6S C16S O6S -33(5) . . . . ? 
C18S N6S C17S N6S 38(3) . . . 10_556 ? 
C16S N6S C17S N6S -121.5(18) . . . 10_556 ? 
C16S N6S C18S N6S 120(2) . . . 10_556 ? 
C17S N6S C18S N6S -38(3) . . . 10_556 ? 
C16' N6S' C17' N6S' 75(2) . . . 2_565 ? 
C18' N6S' C17' N6S' -93(3) . . . 2_565 ? 
C20S N7S C19S O7S -1(2) . . . . ? 
C21S N7S C19S O7S 175.6(16) . . . . ? 

 
_diffrn_measured_fraction_theta_max    0.998 
_diffrn_reflns_theta_full              23.31 
_diffrn_measured_fraction_theta_full   0.998 
_refine_diff_density_max    1.170 
_refine_diff_density_min   -0.724 
_refine_diff_density_rms    0.135 

loop_
  _platon_squeeze_void_nr
  _platon_squeeze_void_average_x
  _platon_squeeze_void_average_y
  _platon_squeeze_void_average_z
  _platon_squeeze_void_volume
  _platon_squeeze_void_count_electrons
         1    -0.024    -0.023    -0.090    8868.0    3161.3
         2     0.000     0.500     0.250      15.9       9.8
         3     0.000     0.500     0.750      15.9       8.1
         4     0.500     0.000     0.250      15.9       8.1
         5     0.500     0.000     0.750      15.9       9.8
_platon_squeeze_details
;
;
